# Supplementary material for: Regional versus General Anesthesia for Promoting Independence after Hip Fracture (REGAIN): protocol for a pragmatic, international multicentre trial
Source: PubMed Central journal article supplement — BMJ Open. 2016 Nov 15;6(11):e013473. doi: 10.1136/bmjopen-2016-013473 (PMC5129073; doi:10.1136/bmjopen-2016-013473), 2016-11-15
Supplement: bmjopen-2016-013473supp_appendix.pdf [file bmjopen-2016-013473supp_appendix.pdf]

## **Appendix: REGAIN Investigator Group**

### **REGAIN Executive Committee:**

Mark Neuman, MD (Principal Investigator and Study Chairman), University of Pennsylvania Perelman School of Medicine, Philadelphia

Jeffrey L. Carson, MD, Rutgers-Robert Wood Johnson Medical School

Frederick Sieber, MD, Johns Hopkins University School of Medicine

Jay Magaziner, PhD, MSHyg, University of Maryland School of Medicine

Susan Ellenberg, PhD, University of Pennsylvania, Perelman School of Medicine

### **Co-Investigators:**

Rui Feng, PhD, University of Pennsylvania, Perelman School of Medicine

Lee A. Fleisher, MD, University of Pennsylvania, Perelman School of Medicine

Denise Orwig, PhD, University of Maryland School of Medicine

Samir Mehta, MD, University of Pennsylvania, Perelman School of Medicine

Edward Marcantonio, MD, Beth Israel Deaconess Medical Center

Nabil Elkassabany, MD, University of Pennsylvania, Perelman School of Medicine

J. Sanford Schwartz, MD, University of Pennsylvania, Perelman School of Medicine

Steven L. Kates, MD, Virginia Commonwealth University

### **REGAIN Clinical Coordinating Center**

#### **Personnel:**

*University of Pennsylvania, Perelman School of Medicine:*

Mark Neuman, MD, MS (Principal Investigator), Lakisha Gaskins, MHS (Project Manager), Brittney Montgomery, MS (Clinical Research Coordinator)

### **REGAIN Data Coordinating Center**

#### **Personnel:**

*University of Pennsylvania, Perelman School of Medicine:*

Elaine Spangler (Project Manager)

Ro-Pauline Doe (Project Manager)

Denise Cifelli (Project Manager)

Christopher Helker (Project Manager)

Nyra Williams (Data Manager)

Jim Datillo (Data Analyst)

Ann Tierney (Biostatistician)

### **REGAIN Sites:**

*Brigham and Women's Hospital, Boston MA*  
Principal Investigator: Kamen Vlassakov, MD

Sub-Investigator: Lauren Gavin, MD  
*Cleveland Clinic, Cleveland OH*

Principal Investigator: Daniel Sessler, MD

Site Directors: Wael Ali Sakr Esr, MD, PhD,

Sabry Ayad, MD, Manal Hassan, MD, PhD

Site Coordinators: Eric Reville, Karen

Hovsepyan, MD, Azfar Niazi, MD, Hooman

Honar, MD

*Christiana Hospital, Newark DE*

Principal Investigator: Mark Cipolle, MD, PhD

Sub-Investigator: Ashley Berry, MD,

Nicholas Quercetti, MD

Site Coordinator: John Getchell

*Englewood Hospital and Medical Center, Englewood NJ*

Principal Investigator: Aryeh Shander MD

Sub-Investigator: Gregg Lobel, MD

Site Coordinators: Oshuare Aregbeyen, MD,

Tamara Friedman, PhD

*Florida Hospital, Orlando FL*

Principal Investigator: Thomas Looke MD, PhD

Site Coordinator: Nadine McDaniel

*Hartford Hospital, Hartford CT*

Principal Investigators: Courtland Lewis

MD, Richard Sheppard, MD

Site Coordinators: Giselle Cyr, Deborah

Katten

*Henry Ford Hospital, Detroit MI*

Principal Investigator: Mohamed Rida

Alsaden, MD

Site Coordinators: Carly Cavazos, Wilma J. Ruffin  
*Johns Hopkins Bayview Medical Center, Baltimore MD*  
Principal Investigator: Frederick Sieber MD  
Sub-Investigator: Jean-Pierre Ouanes DO  
Site Coordinators: Kori Kindbom, Michael Sklar, Rachel Burns  
*Inova Fairfax Hospital, Falls Church VA*  
Principal Investigator: Robert Hymes, MD  
Site Coordinator: Lolita Ramsey, PhD, Sharon Hasser, Rabia Ali  
*London Health Sciences Centre, London ON Canada*  
Principal Investigator: David Sanders, MD  
Site Coordinator: Christina Tieszer  
*Newton Wellesley Hospital, Newton MA*  
Principal Investigator: Alexander Hannenberg, MD  
Site Coordinator: Adrienne Sternthal  
*Northwestern Memorial Hospital, Chicago IL*  
Principal Investigator: Antoun Nader, MD  
Site Coordinator: Mark Kendall, MD  
*New York-Presbyterian Weill Cornell Medicine, New York NY*  
Principal Investigator: Tiffany Tedore, MD  
Site Coordinator: Mariya Redko  
*New York University Langone Medical Center, New York, NY*  
Principal Investigator: Mitchell Marshall, MD  
Site Coordinator: Germaine Cuff, PhD, Randy Cuevas  
*Ottawa Hospital, Ottawa, ON Canada*  
Principal Investigator: Steven Papp, MD  
Site Coordinator: Julia Foxall  
*Penn Presbyterian Medical Center, Philadelphia PA*  
Principal Investigator: Derek Donegan, MD  
Site Coordinator: Samuel Oduwole  
*Penn State Hershey Medical Center, Hershey PA*  
Principal Investigator: Sanjib Adhikary, MD  
Site Coordinators: Ethan Reeder, Nancy Ruth Jarbadan

*Reading Hospital, Reading PA*  
Principal Investigator: Karen Troxell, MD  
Site Coordinator: Julie Sheidy, Natasha Peifer-Soder, Jennifer Flowers, Renee McLin  
*Rutgers Robert Wood Johnson Medical School, New Brunswick NJ*  
Principal Investigators: Jeffrey L. Carson, MD and Geza Kiss, MD  
Site Coordinator: Fei Chen  
*Sacred Heart Medical Center at RiverBend, Springfield OR*  
Principal Investigator: Barry Perlman, MD, PhD  
Site Coordinator: Gail McKelvy, Becky Hammersmith, Penny O'Leary, Anna Richards, Gayle Buie  
*Sunnybrook Health Sciences Centre, Toronto ON Canada*  
Principal Investigator: Stephen Choi, MD  
Site Coordinator: Shelly Au, PhD  
*Stony Brook Medicine, Stony Brook NY*  
Principal Investigator: Syed Azim, MD  
Site Coordinator: Sabeen Rizwan  
*Temple University, Philadelphia PA*  
Principal Investigators: Meera Gonzalez, MD, Christopher Haydel, MD  
Site Coordinator: Joanne Donnelly  
*Toronto Western Hospital, Toronto Ontario*  
Principal Investigator: Ki Jinn Chin, MD  
Site Coordinators: Rongyu Jin,  
*University of Florida – Gainesville, Gainesville FL*  
Principal Investigator: Joshua Sappenfield, MD  
*University of Florida – Jacksonville, Jacksonville FL*  
Principal Investigator: Matthew Warrick, MD  
Site Coordinator: Kelly Ramdial  
*University of Alabama Birmingham Medical Center, Birmingham Alabama*  
Principal Investigator: Mark Powell, MD  
Site Coordinator: Alicia Kindred  
*University of Alberta hospital, Edmonton Alberta, Canada*

Principal Investigator: Derek Dillane, MD  
Site Coordinator: Michelle Verrier  
*University of Pittsburgh Medical Center,  
Pittsburgh PA*

Principal Investigator: Jonathan Waters, MD  
Site Coordinator: Katie Vulakovich  
*University of Vermont Medical Center,  
Burlington VT*

Principal Investigator: Timothy Dominick,  
MD

Site Coordinator: Alexander Friend  
*University of Texas Austin/ University  
Medical Center Brackenridge, Austin TX*

Principal Investigator: A. Jared Dabiri, MD  
*Virginia Commonwealth University,  
Richmond VA*

Principal Investigator: Stephen Kates, MD  
Site Coordinator: Megan Hansen, Noah  
Vann

*Virginia Mason Medical Center, Seattle WA*

Principal Investigator: Wade Weigel, MD

Site Coordinator: Christine Chan  
*Wake Forest University Baptist Hospital,  
Winston-Salem NC*

Principal Investigator: J. Douglas Jaffe DO  
Site Coordinator: Melissa Brawley  
*Yale School of Medicine – Yale-New Haven  
Hospital, New Haven CT*

Principal Investigator: Shamsuddin Akhatar,  
MD

Site Coordinator: Karen Conway

**REGAIN Lead Stakeholder Partner:**

*Gerontological Society of America,  
Washington, DC*

Greg O'Neill, PhD, Patricia D'Antonio,  
RPh, MS

**REGAIN Patient Partners:**

*Center for Advocacy for the Rights &  
Interests of the Elderly (CARIE),  
Philadelphia, PA*

Diane Menio, MS, Jennifer Hruslinski, JD

*Patient Panel*

Sandy Diamond, Catherine Ferrick, James  
Hunt, Christine Langlois, Donna Nurick,  
Bernice Soffer, Linda Stojak, Eleanor  
Sokoloff

**REGAIN DSMB:**

Duminda N. Wijeyesundera, MD, PhD  
(Chair) Li Ka Shing Knowledge Institute of  
St. Michael's Hospital, Toronto, ON,  
Canada

Sachin Kheterpal, MD, MBA,  
University of Michigan, Ann Arbor MI  
Reneé H. Moore, PhD, Emory University,  
Atlanta GA

Alexander K. Smith, MD, MPH, University  
of California, San Francisco

Laura L. Tosi, MD, Children's National  
Medical Center, Washington, DC

Executive Secretary (non-voting): Rosemary  
Madigan, University of Pennsylvania School  
of Medicine, Philadelphia PA
